# Supplementary material for: IgE‐reactivity profiles to allergen molecules in Russian children with and without symptoms of allergy revealed by micro‐array analysis
Source: PubMed Central journal article supplement (PMC7891667; doi:10.1111/pai.13354), 2020-10-04

**Figure E1**

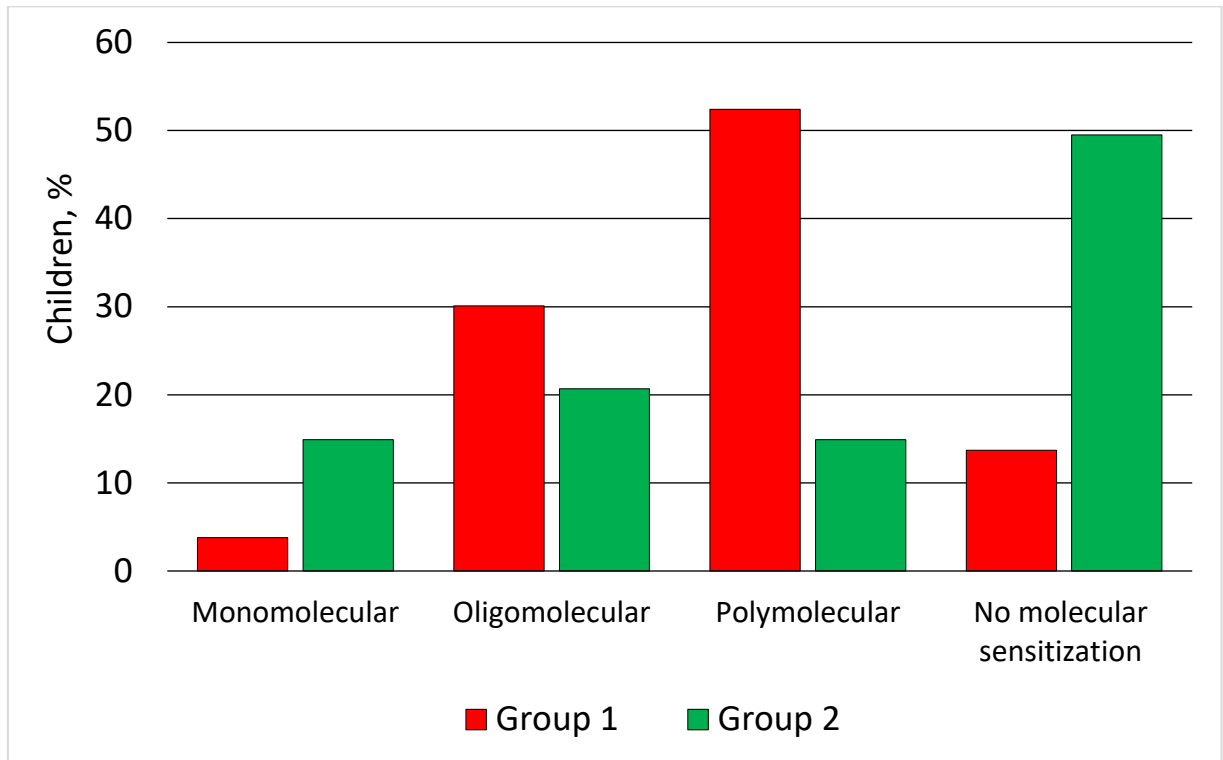

Supplement: PAI-32-251-s001.pdf [file PAI-32-251-s001.pdf]
